# Supplementary material for: The MoxR ATPase RavA and Its Cofactor ViaA Interact with the NADH:Ubiquinone Oxidoreductase I in Escherichia coli
Source: PLoS One. 2014 Jan 15;9(1):e85529. doi: 10.1371/journal.pone.0085529 (PMC3893208; doi:10.1371/journal.pone.0085529)
Supplement: Table S1 — Genes showing statistically significant changes in transcript levels caused by the deletion or overexpression of RavA/ViaA. This is a complete list of genes showing significant changes in transcript levels that were detected by the microarray analyses. All changes in expression are shown as fold-changes with respect to WT for ΔravA::cat, set 1, or WT+p11 for WT+pRV, set 2. Genes showing an increase in expression are listed separately from those showing a decrease. “++” represents a fold-increase that cannot be calculated, and “− −” for a fold-decrease that cannot be calculated, due to the corresponding transcript being undetectable in WT or WT+p11. Genes are sorted by their b-numbers. (XLS) [file pone.0085529.s006.xls]

## Sheet: set 1 decrease
b Number	Gene Name	Description	Fold Change
b0014	dnaK	Chaperone Hsp70; DNA biosynthesis; autoregulated heat shock proteins	-1.59107
b0032	carA	Carbamoyl phosphate synthetase	-1.67018
b0033	carB	Carbamoyl phosphate synthetase	-1.52626
b0162	sdaR	SdaR transcriptional regulator	-1.60214
b0175	cdsA	CDP-diglyceride synthetase	-1.54756
b0221	fadE	Acyl-CoA dehydrogenase	-1.52626
b0473	htpG	HtpG monomer	-1.81504
b0484	copA	YbaR	-2.21914
b0548	ninE	DLP12 prophage, conserved protein similar to phage 82 and lambda proteins	-6.06287
b0621	dcuC	DcuC dicarboxylate transporter	-1.53688
b0674	asnB	Asparagine synthetase B	-3.16017
b0898	ycaD	YcaD MFS transporter	-1.51572
b0934	ssuC	YcbE/YcbM ABC transporter	-1.53688
b1014	putA	PutA bifunctional enzyme and transcriptional regulator	-1.54756
b1223	narK	NarK nitrite MFS transporter	-4.31691
b1415	aldA	Aldehyde dehydrogenase A	-1.58008
b1507	hipA	HipA transcriptional activator	-1.52626
b1508	hipB	HipB transcriptional activator	-1.68179
b1525	sad	NAD-dependent succinate semialdehyde dehydrogenase	-1.69349
b1611	fumC	Fumarase C monomer	-1.72907
b1612	fumA	Fumarase A monomer	-1.51572
b1616	uidB	UidB glucuronides GPH transporter	-2.41162
b1617	uidA	b-glucuronidase	-6.45313
b2014	plaP	Putrescine:H+ symporter	-1.59107
b2046	wzxC	Uncharacterizaed polysaccharide transporter	-1.6358
b2049	cpsB	Mannose-1-phosphate guanylyltransferase-(GDP)	-3.63008
b2143	cdd	Cytidine deaminase	-1.69349
b2220	atoC	AtoC-Phosphorylated transcriptional activator	-1.6358
b2387	fryB	Predicted enzyme IIB component of PTS	-1.70527
b2579	yfiD	Stress-induced alternate pyruvate formate-lyase subunit	-1.82766
b2592	clpB	ClpB chaperone	-1.94531
b2750	cysC	Adenylylsulfate kinase	-1.81504
b2752	cysD	Sulfate adenylyltransferase	-2.53151
b2799	fucO	Propanediol oxidoreductase monomer	-1.85318
b2800	fucA	L-fuculose-phosphate aldolase	-1.79005
b2871	ygeX	2,3-diaminopropionate ammonia-lyase monomer	-1.55833
b2873	hyuA	Phenylhydantoinase monomer	-1.58008
b2888	ygfU	YgfU NCS2 tranporter	-1.71713
b3005	exbD	ExbD uptake of enterochelin; tonB-dependent uptake of B colicins	-1.53688
b3006	exbB	ExbB protein; uptake of enterochelin; tonB-dependent uptake of B colicins	-1.61328
b3060	ttdR	Dan-L-tartrate DNA-binding activator	-1.85318
b3092	uxaC	D-glucuronate isomerase / D-galacturonate isomerase	-1.84038
b3112	tdcG	L-serine deaminase 3	-1.58008
b3113	tdcF	Predicted L-PSP (mRNA) endoribonuclease	-1.64718
b3114	tdcE	2-ketobutyrate formate-lyase / pyruvate formate-lyase 4	-2.31338
b3115	tdcD	Propionate kinase / acetate kinase C	-2.53151
b3116	tdcC	TdcC threonine STP transporter	-2.17347
b3117	tdcB	Threonine dehydratase (catabolic)	-1.84038
b3118	tdcA	TdcA transcriptional activator	-2.11404
b3212	gltB	Glutamate synthase (NADPH) large chain precursor	-1.70527
b3213	gltD	Glutamate synthase (NADPH) small chain	-1.59107
b3408	feoA	Ferrous iron transport protein A	-2.05623
b3409	feoB	FeoB ferrous iron transporter	-3.18215
b3410	feoC	Putative transcriptional regulator	-2.78949
b3469	zntA	Zinc, cobalt and lead efflux system	-1.72907
b3616	tdh	Threonine dehydrogenase	-1.59107
b3617	kbl	2-amino-3-ketobutyrate CoA ligase	-1.6358
b3656	yicI	a-xylosidase	-1.54756
b3691	dgoT	YidT galactonate MFS transporter	-4.62675
b3707	tnaC	tna operon leader peptide	-1.89212
b3709	tnaB	TnaB tryptophan ArAAP transporter	-1.71713
b3744	asnA	Aspartate-ammonia ligase	-11.1579
b3746	ravA	MoxR AAA+ ATPase interacting with LdcI	--
b3763	pssR	HdfR transcriptional regulator	-1.64718
b3846	fadB	Multifunctional enzyme involved in fatty acid oxidation	-1.67018
b3863	polA	DNA polymerase I	-1.52626
b3870	glnA	Adenylyl-glutamine synthetase	-1.72907
b3908	sodA	Superoxide dismutase (Mn)	-2.31338
b3927	glpF	GlpF - glycerol MIP channel	-1.85318
b3947	ptsA	PEP-protein phosphotransferase system enzyme I	-2.28153
b4002	zraP	Zinc homeostasis protein	-3.13834
b4021	pepE	Peptidase E, a dipeptidase where amino-terminal residue is aspartate	-1.6358
b4032	malG	Maltose/Maltodextrin Transport System	-2.08493
b4033	malF	Maltose/Maltodextrin Transport System	-2.07053
b4034	malE	Maltose/Maltodextrin Transport System	-2.17347
b4035	malK	Maltose/Maltodextrin Transport System	-2.20381
b4077	gltP	GltP glutamate/aspartate DAACS transporter	-1.6245
b4119	melA	a-galactosidase monomer	-1.6245
b4209	ytfE	Protein for repairing stress-damaged Fe-S clusters	-1.51572
b4213	cpdB	2',3'-cyclic nucleotide 2'-phosphodiesterase / 3'-nucleotidase	-1.75321
b4252	tabA	Toxin-antitoxin biofilm protein	-1.58008
b4304	sgcC	Putative PTS permease component	-1.85318
b4321	gntP	GntP Gluconate Gnt transporter	-1.7411
b4323	uxuB	Mannonate oxidoreductase	-2.14355
b4431	rprA	Small RNA regulator of RpoS	-3.36359
b4458	oxyS	OxyS RNA; oxidative stress regulator	-2.05623
b0013	yaaI	Predicted protein	-4.22807
b0364	yaiS	Conserved protein	-1.84038
b0629	ybeF	Predicted DNA-binding transcriptional regulator, LYSR-type	-1.51572
b0801	ybiC	Predicted dehydrogenase	-2.02792
b1321	ycjX	Conserved protein	-4.34694
b1322	ycjF	Putative membrane protein	-1.56917
b1571	ydfA	Qin prophage; predicted protein	-1.84038
b1772	ydjH	Predicted kinase	-1.55833
b1862	yebB	Conserved hypothetical protein	-4.69134
b2172	yeiQ	Putative oxidoreductase	-1.55833
b2681	ygaY	Predicted transporter	-1.6245
b2848	yqeJ	Predicted protein	-1.59107
b2870	ygeW	Predicted carbamoyltransferase	-1.72907
b2875	yqeB	Conserved protein with NAD(P)-binding Rossman fold	-1.56917
b2887	ygfT	Fused predicted oxidoreductase, Fe-S subunit and nucleotide-binding subunit	-1.61328
b3074	ygjH	Putative tRNA synthetase	-1.6358
b3602	yibL	Conserved protein	-1.55833
b3881	yihT	Putative aldolase	-1.64718
b4048	yjbM	Conserved hypothetical protein	-2.25012
b4185	yjfM	Conserved hypothetical protein	-4.14106
b4357	yjjM	Predicted DNA-binding regulator	-1.58008
b4358	yjjN	Predicted L-galactonate oxidoreductase	--
b4379	yjjW	Putative pyruvate formate lyase activating enzyme	-1.79005
b4504	ykfH	Predicted protein	--
b4541	yehK	Predicted protein	-1.93187

## Sheet: set 1 increase
b Number	Gene Name	Description	Fold Change
b0012	htgA	Predicted DNA-binding transcriptional regulator	++
b0019	nhaA	Sodium/proton NhaA transporter	1.68179
b0060	polB	DNA polymerase II	1.65864
b0285	paoB	Aldehyde dehydrogenase, FAD-binding domain	1.82766
b0353	mhpT	MhpT MFS transporter	1.51572
b0399	phoB	PhoB-Phosphorylated transcriptional dual regulator	1.60214
b0416	nusB	Transcription antitermination protein NusB	1.55833
b0424	yajL	Chaperone in response to oxidiative stress	1.60214
b0443	fadM	Thioesterase III	2.09943
b0581	ybdK	g-glutamyl:cysteine ligase YbdK	1.79005
b0600	ybdL	Methionine aminotransferase, PLP-dependent	1.87905
b0692	potE	Putrescine/proton symporter: putrescine/ornithine antiporter	3.29436
b0708	phrB	Deoxyribodipyrimidine photolyase (photoreactivation)	1.6245
b0752	zitB	Zn2+/Cd2+/Ni2+/Cu2+ efflux transporter	1.70527
b0908	aroA	3-phosphoshikimate-1-carboxyvinyltransferase	1.6245
b0966	yccV	Heat shock protein, hemimethylated DNA-binding protein	1.72907
b0972	hyaA	Hydrogenase 1, small subunit	1.67018
b0973	hyaB	Hydrogenase 1, large subunit	1.75321
b0974	hyaC	Hydrogenase 1, b-type cytochrome subunit	2.65737
b0975	hyaD	Protein involved in processing of HyaA and HyaB proteins	1.94531
b0977	hyaF	Protein involved in nickel incorporation into hydrogenase 1 proteins	2.04202
b0980	appA	6-phytase / pH 2.5 acid phosphatase	1.72907
b1089	rpmF	50S ribosomal subunit protein L32	1.91853
b1102	fhuE	Outer membrane porin for ferric-coprogen uptake	1.6358
b1183	umuD	SOS mutagenesis and repair	1.6245
b1184	umuC	SOS mutagenesis and repair	2.49666
b1264	trpE	Anthranilate synthase component I	3.91768
b1265	trpL	Trp operon leader peptide	7.72749
b1285	yciR	RNase II modulator	1.52626
b1353	sieB	Rac prophage; phage superinfection exclusion protein	1.98618
b1416	gapC	Interrupted glyceraldehyde-3-dehydrogenase	1.56917
b1465	narV	Nitrate reductase Z, g-subunit	1.79005
b1536	ydeI	Oxidative stress tolerance protein	1.54756
b1562	hokD	Polypeptide destructive to membrane potential	2.54912
b1609	rstB	Sensor kinase-phosphotransferase	2.46229
b1660	ydhC	YdhC drug MFS transporter	1.56917
b1721	arpB	Hypothetical protein	2.42839
b1806	yeaY	YeaY-outer membrane lipoprotein	1.79005
b1916	sdiA	SdiA transcriptional activator	1.51572
b1973	yodA	Cadmium-induced metal binding protein	1.76541
b2086	yegS	Lipid kinase	1.56917
b2194	ccmH	Cytochrome c biogenesis protein CcmH	1.81504
b2195	ccmG	Thioredoxin-like protein, cytochrome c biogenesis	1.90528
b2196	ccmF	Cytochrome c-type biogenesis protein	2.11404
b2197	ccmE	CcmABCDEFGH cytochrome c biogenesis system	1.65864
b2198	ccmD	CcmABCDEFGH cytochrome c biogenesis system	1.51572
b2199	ccmC	CcmABCDEFGH cytochrome c biogenesis system	2.11404
b2200	ccmB	CcmABCDEFGH cytochrome c biogenesis system	1.84038
b2201	ccmA	CcmABCDEFGH cytochrome c biogenesis system	1.79005
b2202	napC	Cytochrome c protein	1.60214
b2203	napB	Small subunit of periplasmic nitrate reductase, cytochrome c550 protein	1.52626
b2204	napH	Ferredoxin-type protein	1.8025
b2253	arnB	UDP-L-Ara4O C-4" transaminase	1.81504
b2254	arnC	Undecaprenyl phosphate-L-Ara4FN transferase	1.58008
b2255	arnA	UDP-L-Ara4N formyltransferase / UDP-GlcA C-4"-decarboxylase	1.67018
b2353	tfaS	CPS-53 (KpLE1) prophage; tail fiber assembly protein fragment	1.79005
b2365	dsdX	D-serine tranporter	1.51572
b2370	evgS	Sensor kinase phosphotransferase	1.58008
b2393	nupC	NupC nucleoside NUP transporter	2.39496
b2507	guaA	GMP synthase / GMP synthase (ammonia dependent)	1.67018
b2508	guaB	IMP dehydrogenase	1.72907
b2526	hscA	Chaperone, member of Hsp70 protein family	1.89212
b2527	hscB	Hsc20 co-chaperone that acts with Hsc66 in IscU iron-sulfur cluster assembly	1.69349
b2530	iscS	Cysteine desulfurase monomer	1.97247
b2531	iscR	IscR transcriptional regulator	1.85318
b2838	lysA	Diaminopimelate decarboxylase	++
b2881	xdhD	Putative oxidoreductase; possible selenate reductase / role in purine salvage	1.68179
b2937	speB	Agmatinase	1.69349
b2942	metK	MetK S-adenosylmethionine synthetase monomer	2.21914
b3093	exuT	ExuT hexuronate MFS transporter	1.61328
b3096	mzrA	Regulator of EnvZ/OmpR osmoregulatory signalling	1.54756
b3161	mtr	Mtr tryptophan ArAAP transporter	4.59479
b3324	gspC	Putative protein secretion protein for export	1.8025
b3393	hofO	Protein involved in utilization of DNA as a carbon source	3.38698
b3475	acpT	Holo-[acyl carrier protein] synthase 2	1.53688
b3513	mdtE	MdtEF multidrug transporter	2.71321
b3514	mdtF	MdtEF multidrug transporter	2.08493
b3517	gadA	Glutamate decarboxylase A subunit	2.21914
b3528	dctA	C4-dicarboxylate / orotate:H+ symporter	1.55833
b3714	purP	Adenine:H+ symporter	++
b3717	cbrC	Colicin E2 tolerance protein	3.50642
b3729	glmS	L-glutamine:D-fructose-6-phosphate aminotransferase	1.53688
b3745	viaA	VWA-containing protein associated with RavA	3.70635
b3747	kup	TrkD potassium KUP transporter	16.7955
b3826	yigL	Sugar phosphatase	1.69349
b3869	ntrB	NtrB sensory histidine kinase	1.71713
b3981	secE	Sec Protein Secretion Complex	1.53688
b4309	nanS	Probable 9-O-acetyl-N-acetylneuraminate esterase	3.16017
b4410	ecnA	entericidin A, antidote to lipoprotein entericidin B	1.7411
b4412	hokC	HokC, Gef toxin; interferes with membrane function when in excess	1.53688
b4416	rybA	Small RNA	1.65864
b4417	rybB	Small RNA that interacts with Hfq	1.69349
b4420	rdlA	Antisense RNA, trans-acting regulator of ldrA	1.60214
b4422	rdlB	Antisense RNA, trans-acting regulator of ldrB	1.76541
b4424	rdlC	Antisense RNA, trans-acting regulator of ldrC	2.12874
b4526	ydaE	Rac prophage; zinc-binding protein	4.78991
b0135	yadC	Putative fimbrial-like protein	4.50023
b0137	yadL	Putative adhesin-like protein	1.52626
b0289	yagV	Conserved protein	1.77769
b0453	ybaY	Predicted outer membrane lipoprotein	1.51572
b0546	ybcM	DLP12 prophage; predicted DNA-binding transcriptional regulator	1.98618
b0603	ybdO	Predicted DNA-binding transcriptional regulator LYSR-type	2.75108
b0637	ybeB	Predicted protein	1.51572
b0648	ybeU	Predicted tRNA ligase	4.05584
b0689	ybfP	Predicted protein	++
b0773	ybhB	Predicted kinase inhibitor	1.65864
b0943	ycbV	Predicted fimbrial-like adhesin protein	++
b1168	ycgG	Conserved protein	1.58008
b1242	ychE	Predicted inner membrane protein	2.14355
b1358	ydaT	Rac prophage; hypothetical protein	1.60214
b1359	ydaU	Rac prophage; hypothetical protein	1.64718
b1510	ydeK	Predicted lipoprotein	1.6358
b1541	ydfZ	Conserved protein	2.42839
b1685	ydiH	Hypothetical protein	1.64718
b1688	ydiK	Hypothetical protein; transcription may be purine regulated	1.55833
b1707	ydiV	Conserved protein	1.55833
b1856	yebA	Predicted peptidase	1.58008
b1932	yedL	Predicted acyltransferase	1.71713
b1956	yedQ	Predicted diguanylate cyclase	1.61328
b1964	yedS	Putative outer membrane protein	1.67018
b1965	yedS 2	Putative outer membrane protein	1.76541
b2332	yfcO	Conserved hypothetical protein	1.93187
b2345	yfdF	Hypothetical protein	++
b2602	yfiL	Predicted lipoprotein	1.59107
b2629	yfjM	CP4-57 prophage; predicted protein	2.15846
b3036	ygiA	Predicted protein	1.71713
b3220	yhcG	Conserved hypothetical protein	1.8025
b3508	yhiD	Predicted Mg2+ transport ATPase	1.93187
b3524	yhjG	Predicted outer membrane biogenesis protein	1.87905
b3527	yhjJ	Predicted Zn-dependent peptidase	4.08405
b4269	yjgB	Predicted alcohol dehydrogenase; Zn- and NAD(P)-dependent	1.71713
b4274	yjgW	KpLE2 phage-like element	3.68075
b4275	yjgX	KpLE2 phage-like element; putative transmembrane protein	1.69349
b0457	ylaB	Conserved inner membrane protein	1.67018
b1144	ymfJ	e14 prophage; predicted protein	1.51572
b1330	ynaI	Conserved inner membrane protein	1.70527
b1451	yncD	Probable TonB-dependent receptor	1.56917
b1588	ynfF	Oxidoreductase subunit paralog of DmsA	1.54756
b1589	ynfG	Oxidoreductase, Fe-S subunit paralog of DmsB	1.54756
b1808	yoaA	Conserved protein	1.55833
b1815	yoaD	Predicted phosphodiesterase	1.81504
b1843	yobB	Conserved protein	1.71713
b2211	yojI	Fused predicted multidrug ABC transporter; ATP-binding component	1.64718
b2689	yqaA	Conserved inner membrane protein	1.51572
b2941	yqgD	Hypothetical protein	1.6245
b3099	yqjE	Conserved inner membrane protein	1.86607

## Sheet: set 2 decrease
b Number	Gene Name	Description	Fold Change
b0342	lacA	Galactoside O-acetyltransferase monomer	-5.54044
b0344	lacZ	b-galactosidase monomer	--
b1490	dosC	Diguanylate cyclase	-2.11404
b2414	cysK	Cysteine synthase	-2.25012
b2421	cysM	Cysteine synthase B	-2.07053
b2422	cysA	Sulfate ABC transporter	-4.31691
b2423	cysW	Sulfate ABC transporter	-2.8481
b2424	cysU	Sulfate ABC transporter	-5.09824
b2425	cysP	Thiosulfate ABC transporter	-4.78991
b2750	cysC	Adenylylsulfate kinase	-3.16017
b2751	cysN	Sulfate adenylyltransferase	-3.70635
b2752	cysD	Sulfate adenylyltransferase	-5.93809
b2762	cysH	3'-phospho-adenylylsulfate reductase	-4.40762
b2763	cysI	Sulfite reductase hemoprotein subunit	-3.73213
b2764	cysJ	Sulfite reductase flavoprotein subunit	-4.95883
b2942	metK	MetK S-adenosylmethionine synthetase monomer	-1.59107
b3408	feoA	Ferrous iron transport protein A	-2.14355
b3409	feoB	FeoB ferrous iron transporter	-1.79005
b3410	feoC	Putative Fe-S-dependent transcriptional regulator	-1.59107
b1257	yciE	Conserved protein associated with stress response	-1.65864
b1287	yciW	Predicted oxidoreductase	-3.68075
b1729	ydjN	Predicted transporter	-2.53151
b2012	yeeD	Conserved hypothetical protein	-3.97237
b2013	yeeE	Putative transport system permease protein	-4.56305

## Sheet: set 2 increase
b Number	Gene Name	Description	Fold Change
b0314	betT	BetT choline BCCT transporter	1.94531
b1851	edd	Phosphogluconate dehydratase	1.65864
b2105	rcnR	RcnR DNA-binding transcriptional regulator	++
b2155	cirA	Outer membrane ferric siderophore, colicin receptor	4.92458
b2557	purL	Phosphoribosylformylglycinamide synthase	3.81055
b2980	glcC	GlcC transcriptional dual regulator	++
b3238	yhcN	Hydrogen peroxide stress-induced protein	2.14355
b3372	frlC	Fructoselysine 3-epimerase	1.6245
b3395	hofM	Protein involved in utilization of DNA as a carbon source	4.34694
b3743	asnC	AsnC transcriptional repressor	1.89212
b3744	asnA	Aspartate-ammonia ligase	1.95884
b3745	viaA	VWA-containing protein associated with RavA	12.2101
b3746	ravA	MoxR AAA+ ATPase interacting with LdcI	6.40856
b3823	rhtC	RhtC threonine Rht efflux transporter	1.72907
b0427	yajR	YajR putative MFS transporter	2.63902
b0960	yccS	Hypothetical protein	1.54756
b1315	ycjS	NADH-dependent dehydrogenase	1.67018
b1457	ydcD	Hypothetical protein	1.64718
b1671	ydhX	Putative oxidoreductase, Fe-S subunit	2.07053
b1774	ydjJ	Predicted oxidoreductase, Zn-dependent and NAD(P)-binding	1.65864
b1959	yedA	Putative transmembrane subunit	1.54756
b2973	yghJ	Predicted inner membrane lipoprotein	1.6358
b3108	yhaM	Conserved protein of unknown function	2.62079
b3110	yhaO	YhaO putative STP transporter	3.43426
